# Supplementary material for: Significance of the NOR1-FOXA1/HDAC2-Slug regulatory network in epithelial-mesenchymal transition of tumor cells
Source: PubMed Central journal article supplement (PMC4941348; doi:10.18632/oncotarget.7778), 2016-02-27
Supplement: oncotarget-07-16745-s001.pdf [file oncotarget-07-16745-s001.pdf]

## Significance of the NOR1-FOXA1/HDAC2-Slug regulatory network in epithelial-mesenchymal transition of tumor cells

### Supplementary Materials

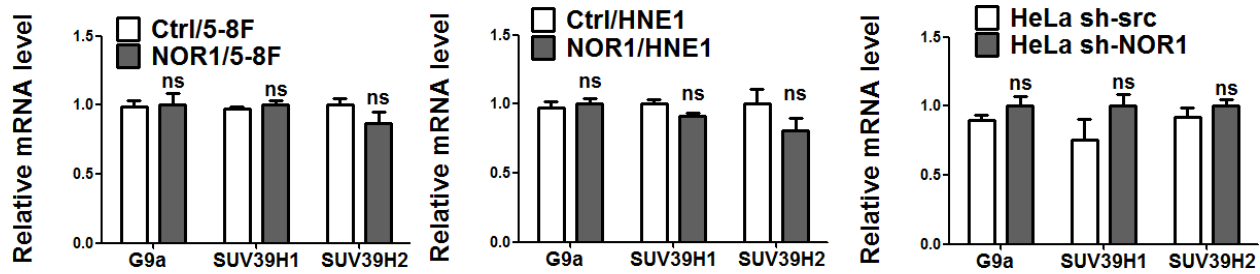

**Supplementary Figure S1: mRNA levels of histone methyltransferase genes in NOR1-deficient or NOR1-expressing tumor cells were measured by qRT-PCR.** The data showed that ectopic expression of NOR1 in NPC 5-8F and HNE1 cells does not affect the mRNAs level of *G9a*, *Suv39h1* or *Suv39h2*. As expected, stable silencing of NOR1 in HeLa cells also did not affect the mRNA levels of *G9a*, *Suv39h1* and *Suv39h2*.

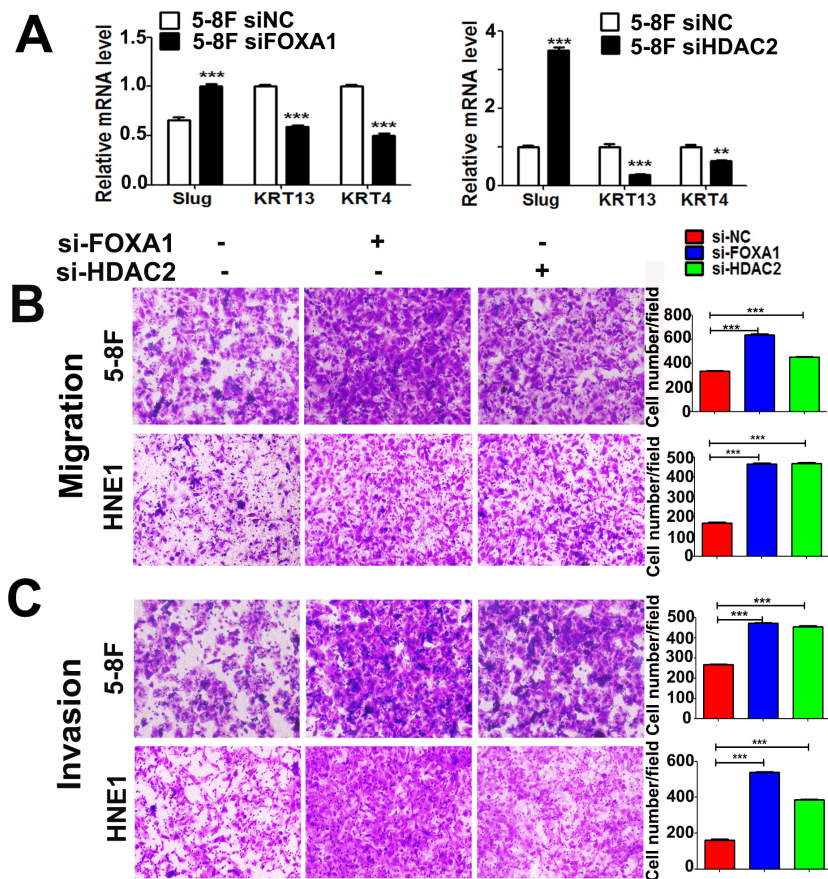

**Supplementary Figure S2: Transiently silencing FOXA1 or HDAC2 initiates the EMT process in NPC cells.** (A) NPC 5-8F cells were transiently transfected with siRNA against either FOXA1 or HDAC2. Expression of FOXA1, HDAC2, keratin 4, keratin13 and Slug was examined by qRT-PCR 48 hours after siRNA transfection. (B) Silencing of FOXA1 or HDAC2 results in increased cell migration in Transwell migration assays. Cells that migrated from serum-free to serum-containing medium within 6 hours were stained with crystal violet (micrographs) and counted (bar graphs). Quantitation is from five random fields from each membrane, and averaged from triplicates of three independent experiments. Error bars represent SEM. (C) Transwell invasion assays. The same cell types were subjected to a tumor cell invasion assay. The graph provides summarized data of five independent experiments.  $**P < 0.01$ ,  $***P < 0.001$  as compared to the control cells.

**Supplementary Table S1: siRNA or shRNA sequences used in this study**

|                  | sense 5'–3'               |
|------------------|---------------------------|
| Scrambled siRNAs | UUCUCCGAACGUGUCACGUTT     |
| FOXA1 siRNA      | GAGAGAAAAAAUCAACAGC       |
| HDAC2 siRNA      | GCCUCAUAGAAUCCGCAUG       |
| Slug siRNA       | AUCAGAAUGGGUCUGCAGAUGAGCC |
| Scrambled shRNAs | TTCTCCGAACGTGTCACGT       |
| NOR1 shRNA       | GAACAUCCCGGAGACAAG        |

**Supplementary Table S2: Primers used in this study**

| Genes                       | 5'—3'                   | Location     |
|-----------------------------|-------------------------|--------------|
| <b>Primers used in ChIP</b> |                         |              |
| F1S-P1 F:                   | CACCCTCGGATACCTGCTGA    | -1976--1755  |
| F1S-P1 R:                   | TCCTTGTTTCACTCTACACAGTC |              |
| F1S-P2 F:                   | ACTGTGTAGAGTGAAACAAGGA  | -1776 --1642 |
| F1S-P2 R:                   | GGGTTTATGAGAGCAGGAGT    |              |
| F1S-P3 F:                   | TTAGGAAATCTGTGAGTGCC    | -1410--1240  |
| F1S-P3 R:                   | TCTAACAGGTGCTGGAGG      |              |
| F1S-P4 F:                   | GTTGAGGCTCTCCTTCCT      | 693 – 871    |
| F1S-P4 R:                   | CCATTTAGGAGGGGCATAC     |              |
| F1S-P5 F:                   | AAATGCATACCACAAATGCAA   | 3436 – 3569  |
| F1S-P5 R:                   | ACAACATCTCAGTTTCATACAG  |              |
| F1S-P6 F:                   | TCACACTTTCTGGGTGCA      | 3913 – 4054  |
| F1S-P6 R:                   | ACTGTTACAGTGTGTAGGTA    |              |
| F1S-P7 F:                   | ATGATAGTAAGGAGAGGTCC    | 5512 – 5628  |
| F1S-P7 R:                   | CTATACATGCACATTGTACC    |              |
| HS-P1 F:                    | CACCCTCGGATACCTGCTGA    | -1976--1755  |
| HS-P1 R:                    | TCCTTGTTTCACTCTACACAGTC |              |
| HS-P2 F:                    | GTGTGTGGAGAAATCGAA      | -1559--1391  |
| HS-P2 R:                    | GGCACTCACAGATTTCTAA     |              |
| HS-P3 F:                    | CAAATGACAGTTACCTCTTGC   | -775--669    |
| HS-P3 R:                    | AAAGAAATGCTTTGTAGCCC    |              |

**Primers used in qPCR**

|            |                        |
|------------|------------------------|
| FOXA1 F:   | TCCAGGATGTTAGGAACTGTGA |
| FOXA1 R:   | CCGCTCGTAGTCATGGTGT    |
| HDAC2 F:   | CCCCTCCTCCTCCC         |
| HDAC2 R:   | GGGATGACCCTGTCCATAAT   |
| Slug F:    | AGATCTGCCAGACGCGAACT   |
| Slug R:    | GCATGCGCCAGGAATGTTCA   |
| KRT4 F:    | AGCCGAGAATGACTTTGTG    |
| KRT4 R:    | TGTCGCTGACATGGGTCT     |
| KRT13 F:   | TCCAGGGACTCATCAGCA     |
| KRT13 R:   | GAGGAAGGGAAACCAATCA    |
| SUV39H1 F: | TGCCCAAATCGTGTGGTACA   |
| SUV39H1 R: | CTGACGGTCGTAGATCTGGC   |
| SUV39H2 F: | TCGATACTCGTCTTCCCCGA   |
| SUV39H2 R: | CTCTGCAAGTCACAGCTCCA   |
| G9a F:     | GATTTCCACGCATCGCCTTC   |
| G9a R:     | TCTCAGAGCCACATTGGCAG   |
